# Supplementary material for: Dual Delayed Feedback Provides Sensitivity and Robustness to the NF-κB Signaling Module
Source: PubMed Central journal article supplement (PMC3694842; doi:10.1371/journal.pcbi.1003112), 2013-06-27
Supplement: pcbi.1003112.s010.pdf [file pcbi.1003112.s010.pdf]

**Table S1. Model parameter values**

|          | <b>Parameter Description</b>                              | <b>Model Value**</b> | <b>Ref. Value</b> | <b>Ref.</b>                    |
|----------|-----------------------------------------------------------|----------------------|-------------------|--------------------------------|
| $a_y$    | I $\kappa$ B $\alpha$ constitutive synthesis*             | 0.00185 nM/min       | 0.0185 nM/min     | (Kearns <i>et al</i> , 2006)   |
| $b_y$    | I $\kappa$ B $\alpha$ inducible synthesis*                | 5.0 nM/min           | 138.6 nM/min      | (Kearns <i>et al</i> , 2006)   |
| $d_y$    | I $\kappa$ B $\alpha$ promoter: number $\kappa$ B sites   | 1.0                  |                   |                                |
| $f_0$    | NF- $\kappa$ B binding I $\kappa$ B promoter              | 10.0 /(nMmin)        |                   |                                |
| $f_1$    | NF- $\kappa$ B unbinding I $\kappa$ B promoter            | 200.0/min            |                   |                                |
| $\tau_y$ | Delay in I $\kappa$ B $\alpha$ synthesis                  | 25.0 min             | 25.8 min          | this work                      |
| $k_y$    | I $\kappa$ B $\alpha$ binding with NF- $\kappa$ B         | 0.1 /(nMmin)         | 0.03 /(nMmin)     | (Kearns <i>et al</i> , 2006)   |
| $k_{-y}$ | I $\kappa$ B $\alpha$ dissociates from NF- $\kappa$ B     | 0.0006/min           | 0.00006/min       | (Kearns <i>et al</i> , 2006)   |
| $X$      | Total NF- $\kappa$ B                                      | 100 nM               | 100 nM            | (Hoffmann <i>et al</i> , 2002) |
| $g_y$    | Constitutive I $\kappa$ B $\alpha$ degradation            | 0.012/min            | 0.12/min          | (Kearns <i>et al</i> , 2006)   |
| $r_y$    | Degradation of I $\kappa$ B $\alpha$ by IKK               | 0.01/min             | 0.018/min         | (Kearns <i>et al</i> , 2006)   |
| $a_z$    | I $\kappa$ B $\epsilon$ constitutive synthesis*           | 0.00046 nM/min       | 0.0046 nM/min     | (Kearns <i>et al</i> , 2006)   |
| $b_z$    | I $\kappa$ B $\epsilon$ inducible synthesis*              | 5.0 nM/min           | 18.0 nM/min       | (Kearns <i>et al</i> , 2006)   |
| $d_z$    | I $\kappa$ B $\epsilon$ promoter: number $\kappa$ B sites | 1.0                  |                   |                                |
| $\tau_z$ | Delay in I $\kappa$ B $\epsilon$ synthesis                | 72.0 min             | 59.4 min          | this work                      |
| $k_z$    | I $\kappa$ B $\epsilon$ binding with NF- $\kappa$ B       | 0.1 /(nMmin)         | 0.03 /(nMmin)     | (Kearns <i>et al</i> , 2006)   |
| $k_{-z}$ | I $\kappa$ B $\epsilon$ dissociates from NF- $\kappa$ B   | 0.0006/min           | 0.00006/min       | (Kearns <i>et al</i> , 2006)   |
| $g_z$    | Constitutive I $\kappa$ B $\epsilon$ degradation          | 0.018/min            | 0.18/min          | (Kearns <i>et al</i> , 2006)   |
| $r_z$    | Degradation of I $\kappa$ B $\epsilon$ by IKK             | 0.01/min             | 0.018/min         | (Kearns <i>et al</i> , 2006)   |

\*per 1  $\kappa$ B site

\*\*\*1 nM = 1000 molecules for a cell volume that is on the order of 1 pico liter
