# Supplementary material for: Dual Delayed Feedback Provides Sensitivity and Robustness to the NF-κB Signaling Module
Source: PubMed Central journal article supplement (PMC3694842; doi:10.1371/journal.pcbi.1003112), 2013-06-27
Supplement: pcbi.1003112.s011.pdf [file pcbi.1003112.s011.pdf]

**Table S2. Auto-repressor network reactions**

| <b>Reaction</b>               | <b>Rate</b>   | <b>Description</b>                                     |
|-------------------------------|---------------|--------------------------------------------------------|
| $d_0 + x \leftrightarrow d_1$ | $k_y, k_{-y}$ | binding and unbinding of the repressor to the promoter |
| $x \rightarrow \phi$          | $g_y$         | degradation of the repressor                           |
| $d_0 \rightarrow d_0 + x$     | $a_y(1 + K)$  | synthesis of the repressor (delayed reaction)          |
