# Supplementary material for: Dual Delayed Feedback Provides Sensitivity and Robustness to the NF-κB Signaling Module
Source: PubMed Central journal article supplement (PMC3694842; doi:10.1371/journal.pcbi.1003112), 2013-06-27
Supplement: pcbi.1003112.s012.pdf [file pcbi.1003112.s012.pdf]

**Table S3. Auto-repressor network parameter values**

|          | <b>Parameter Description</b>         | <b>Parameter Value</b> |
|----------|--------------------------------------|------------------------|
| $a_y$    | repressor synthesis rate             | 1.0 nM/min             |
| $g_y$    | repressor degradation rate           | 0.012/min              |
| $k_y$    | binding of repressor to promoter     | 0.1 nM/min             |
| $k_{-y}$ | unbinding of repressor from promoter | 0.06/min               |
| $\tau_z$ | delay in synthesis of repressor      | 25.0 min               |
