# Supplementary material for: Dual Delayed Feedback Provides Sensitivity and Robustness to the NF-κB Signaling Module
Source: PubMed Central journal article supplement (PMC3694842; doi:10.1371/journal.pcbi.1003112), 2013-06-27
Supplement: pcbi.1003112.s013.pdf [file pcbi.1003112.s013.pdf]

**Table S4. Stochastic model variables**

| <b>Variable</b>                   | <b>Description</b>                                                  |
|-----------------------------------|---------------------------------------------------------------------|
| $IKK\alpha$                       | Active form of $IKK$ kinase                                         |
| $IKK\epsilon$                     | Active form of $IKK$ kinase                                         |
| $IKK_i$                           | Inactive form of $IKK$ kinase                                       |
| $IKK_n$                           | Neutral form of $IKK$ kinase                                        |
| $G_{I\kappa B\alpha}$             | Discrete state of $I\kappa B\alpha$ gene promoter                   |
| $G_{I\kappa B\epsilon}$           | Discrete state of $I\kappa B\epsilon$ gene promoter                 |
| $G_{A20}$                         | Discrete state of A20 gene promoter                                 |
| $NF-\kappa B$                     | Free cytoplasmic NF- $\kappa$ B                                     |
| $nNF-\kappa B$                    | Free nuclear NF- $\kappa$ B                                         |
| $I\kappa B\alpha$                 | Free cytoplasmic $I\kappa B\alpha$                                  |
| $I\kappa B\epsilon$               | Free cytoplasmic $I\kappa B\epsilon$                                |
| $nI\kappa B\alpha$                | Free nuclear $I\kappa B\alpha$                                      |
| $nI\kappa B\epsilon$              | Free nuclear $I\kappa B\epsilon$                                    |
| $A20$                             | Cytoplasmic A20 protein                                             |
| $tI\kappa B\alpha$                | $I\kappa B\alpha$ mRNA transcript                                   |
| $tI\kappa B\epsilon$              | $I\kappa B\epsilon$ mRNA transcript                                 |
| $tA20$                            | A20 mRNA transcript                                                 |
| $pI\kappa B\alpha$                | Phosphorilated $I\kappa B\alpha$                                    |
| $pI\kappa B\epsilon$              | Phosphorilated $I\kappa B\epsilon$                                  |
| $I\kappa B\alpha\_NF-\kappa B$    | Cytoplasmic NF- $\kappa$ B and $I\kappa B\alpha$ complex            |
| $I\kappa B\epsilon\_NF-\kappa B$  | Cytoplasmic NF- $\kappa$ B and $I\kappa B\epsilon$ complex          |
| $nI\kappa B\alpha\_NF-\kappa B$   | Nuclear NF- $\kappa$ B and $I\kappa B\alpha$ complex                |
| $nI\kappa B\epsilon\_NF-\kappa B$ | Nuclear NF- $\kappa$ B and $I\kappa B\epsilon$ complex              |
| $pI\kappa B\alpha\_NF-\kappa B$   | Cytoplasmic NF- $\kappa$ B and phospho- $I\kappa B\alpha$ complex   |
| $pI\kappa B\epsilon\_NF-\kappa B$ | Cytoplasmic NF- $\kappa$ B and phospho- $I\kappa B\epsilon$ complex |
