# Supplementary material for: Dual Delayed Feedback Provides Sensitivity and Robustness to the NF-κB Signaling Module
Source: PubMed Central journal article supplement (PMC3694842; doi:10.1371/journal.pcbi.1003112), 2013-06-27
Supplement: pcbi.1003112.s014.pdf [file pcbi.1003112.s014.pdf]

Table S5. Stochastic model parameter values

|                                   | Value                | Unit     | Parameter Description                                      | Reference                     |
|-----------------------------------|----------------------|----------|------------------------------------------------------------|-------------------------------|
| Protein synthesis and degradation |                      |          |                                                            |                               |
| c1,a                              | 0.1                  | $s^{-1}$ | $I\kappa B\alpha$ inducible mRNA synthesis                 | (Paszek <i>et al</i> , 2010)  |
| <b>c1e</b>                        | 0.07                 | $s^{-1}$ | $I\kappa B\epsilon$ inducible mRNA synthesis               | Fitted                        |
| c2,a,e                            | 0.5                  | $s^{-1}$ | Protein translation                                        | (Paszek <i>et al</i> , 2010)  |
| c3,a,e                            | 0.00048              | $s^{-1}$ | mRNA degradation                                           | (Paszek <i>et al</i> , 2010)  |
| c4a,e                             | 0.0001               | $s^{-1}$ | Free $I\kappa B\alpha$ degradation                         | (Paszek <i>et al</i> , 2010)  |
| c4                                | 0.0045               | $s^{-1}$ | A20 degradation                                            | (Werner <i>et al</i> , 2008)  |
| Complex parameters                |                      |          |                                                            |                               |
| c5a,e                             | 0.00001              | $s^{-1}$ | Degradation of complexed $I\kappa B$                       | (Paszek <i>et al</i> , 2010)  |
| <b>ka1a,e</b>                     | $3.33 \cdot 10^{-7}$ | $s^{-1}$ | NF- $\kappa B$ - $I\kappa B$ association                   | Fitted                        |
| kd1a,e                            | $5 \cdot 10^{-4}$    | $s^{-1}$ | $I\kappa B$ -NF- $\kappa B$ dissociation                   | (Paszek <i>et al</i> , 2010)  |
| kc1a,e                            | $5 \cdot 10^{-7}$    | $s^{-1}$ | IKKa phosphorylation of free $I\kappa B$                   | (Paszek <i>et al</i> , 2010)  |
| kc2a,e                            | $2 \cdot 10^{-6}$    | $s^{-1}$ | IKKa phosphorylation of $I\kappa B$ -NF- $\kappa B$        | (Paszek <i>et al</i> , 2010)  |
| kt1a,e                            | 0.1                  | $s^{-1}$ | Degradation of free $pI\kappa B$                           | (Paszek <i>et al</i> , 2010)  |
| kt2a,e                            | 0.1                  | $s^{-1}$ | Degradation of complexed $pI\kappa B$                      | (Paszek <i>et al</i> , 2010)  |
| ke2a,e                            | 0.05                 | $s^{-1}$ | $I\kappa B$ -NF- $\kappa B$ nuclear export                 | (Paszek <i>et al</i> , 2010)  |
| <b>ki3a,e</b>                     | 0.0005               | $s^{-1}$ | $I\kappa B$ nuclear import                                 | Fitted                        |
| <b>ke3a,e</b>                     | 0.00125              | $s^{-1}$ | $I\kappa B$ nuclear export                                 | Fitted                        |
| IKKK and IKK activation           |                      |          |                                                            |                               |
| kr                                | 0.025                | $s^{-1}$ | IKKKn activation by TNF $\alpha$                           | (Paszek <i>et al</i> , 2010)  |
| kri                               | 0.0003               | $s^{-1}$ | IKKKa $\rightarrow$ IKKKn                                  | (Paszek <i>et al</i> , 2010)  |
| kp                                | $1.75 \cdot 10^{-4}$ | $s^{-1}$ | IKKii $\rightarrow$ IKKn                                   | (Paszek <i>et al</i> , 2010)  |
| ka                                | $7 \cdot 10^{-7}$    | $s^{-1}$ | IKKn $\rightarrow$ IKKa                                    | (Paszek <i>et al</i> , 2010)  |
| ki                                | 0.005                | $s^{-1}$ | IKKa $\rightarrow$ IKKi                                    | (Paszek <i>et al</i> , 2010)  |
| kii                               | 0.0015               | $s^{-1}$ | IKKi $\rightarrow$ IKKii                                   | (Paszek <i>et al</i> , 2010)  |
| kaA20                             | $3 \cdot 10^{-7}$    | $s^{-1}$ | IKKKn inactivation by A20                                  | (Paszek <i>et al</i> , 2010)  |
| kbA20                             | $6 \cdot 10^3$       | $s^{-1}$ | A20 inhibition of IKKii $\rightarrow$ IKKn                 | (Paszek <i>et al</i> , 2010)  |
| Other parameters                  |                      |          |                                                            |                               |
| ki1                               | 0.005                | $s^{-1}$ | NF- $\kappa B$ nuclear import                              | (Paszek <i>et al</i> , 2010)  |
| <b>q1</b>                         | $1.5 \cdot 10^{-4}$  | $s^{-1}$ | nfkB DNA binding                                           | (Bosisio <i>et al</i> , 2006) |
| <b>q2a,e</b>                      | $10^{-3}$            | $s^{-1}$ | $I\kappa B$ -mediated NF- $\kappa B$ dissociation from DNA | (Bosisio <i>et al</i> , 2006) |
| -                                 | 60,000               |          | Total NF- $\kappa B$                                       | (Paszek <i>et al</i> , 2010)  |
| $K_{NN}$                          | 10,000               |          | Total level of IKKK                                        | (Paszek <i>et al</i> , 2010)  |
| $K_N$                             | 200,000              |          | Total level of IKK                                         | (Paszek <i>et al</i> , 2010)  |
| -                                 | 60,000               |          | Total NF- $\kappa B$                                       | (Paszek <i>et al</i> , 2010)  |
| $T_D$                             | 45                   | min      | Delay in $I\kappa B\epsilon$ transcription                 | Fitted                        |
| tv                                | $2 \cdot 10^{-12}$   | $l$      | Total cell volume                                          | (Paszek <i>et al</i> , 2010)  |
| kv                                | 5                    |          | Cytoplasm:Nucleus ratio                                    | (Paszek <i>et al</i> , 2010)  |
| TR                                | 1                    |          | TNF $\alpha$ input (10ng/ml)                               | (Paszek <i>et al</i> , 2010)  |
