# Supplementary material for: Dual Delayed Feedback Provides Sensitivity and Robustness to the NF-κB Signaling Module
Source: PubMed Central journal article supplement (PMC3694842; doi:10.1371/journal.pcbi.1003112), 2013-06-27
Supplement: pcbi.1003112.s015.pdf [file pcbi.1003112.s015.pdf]

**Table S6. Organisms with homologs for I $\kappa$ B $\alpha$**

| <b>Organism</b>               | <b>Common name</b>  | <b>NCBI gi number</b> | <b>E-value</b> |
|-------------------------------|---------------------|-----------------------|----------------|
| Mus musculus                  | mouse               | 28386026              | 0              |
| Rattus norvegicus             | rat                 | 160333919             | 0              |
| Sus scrofa                    | pig                 | 52346212              | 9.00E-169      |
| Canis lupus familiaris        | dog                 | 73963074              | 1.00E-168      |
| Bos taurus                    | cow                 | 114052817             | 3.00E-168      |
| Oryctolagus cuniculus         | rabbit              | 291403740             | 7.00E-168      |
| Ovis aries                    | sheep               | 261244990             | 1.00E-167      |
| Pongo abelii                  | orangutan           | 297694934             | 2.00E-167      |
| Macaca mulata                 | rhesus monkey       | 109083336             | 6.00E-167      |
| Macaca fascicularis           | macaque             | 90080313              | 6.00E-167      |
| Homo sapiens                  | human               | 10092619              | 1.00E-166      |
| Ailuropoda melanoleuca        | giant panda         | 301774897             | 2.00E-166      |
| Callithrix jacchus            | marmoset            | 296214818             | 5.00E-165      |
| Nomascus leucogenys           | gibbon              | 332229160             | 9.00E-150      |
| Monodelphis domestica         | opossum             | 126283568             | 2.00E-147      |
| Ornithorhynchus anatinus      | platypus            | 149548454             | 8.00E-138      |
| Gorilla gorilla               | gorilla             | 120974064             | 2.00E-126      |
| Equus caballus                | horse               | 194207294             | 7.00E-126      |
| Pan paniscus                  | bonobo              | 121483818             | 2.00E-125      |
| Taeniopygia guttata           | songbird            | 224051436             | 6.00E-118      |
| Pan troglodytes               | chimp               | 124111100             | 4.00E-117      |
| Anolis carolinensis           | anole               | 327263645             | 9.00E-117      |
| Gallus gallus                 | chicken             | 126723285             | 2.00E-116      |
| Xenopus tropicalis            | western clawed frog | 52345606              | 3.00E-95       |
| Meleagris gallopavo           | turkey              | 326920741             | 8.00E-95       |
| Xenopus laevis                | African clawed frog | 148230967             | 5.00E-94       |
| Salmo salar                   | salmon              | 209737318             | 6.00E-80       |
| Danio rerio                   | zebrafish           | 37725732              | 3.00E-72       |
| Gadus morhua                  | Atlantic cod        | 296044660             | 2.00E-68       |
| Tetraodon nigroviridis        | pufferfish          | 47209080              | 3.00E-63       |
| Lemur catta                   | lemur               | 122938174             | 1.00E-44       |
| Apis mellifera                | honey bee           | 110756132             | 7.00E-34       |
| Biomphalaria glabrata         | snail               | 119393872             | 2.00E-31       |
| Nasonia vitripennis           | wasp                | 156543541             | 8.00E-30       |
| Lutzomyia longipalpis         | sandfly             | 149728129             | 2.00E-29       |
| Drosophila yakuba             | fly                 | 195475366             | 7.00E-29       |
| Aedes aegypti                 | mosquito            | 157108525             | 9.00E-29       |
| Pediculus humanus corporis    | human body louse    | 212512255             | 1.00E-28       |
| Drosophila willistoni         | fly                 | 195433326             | 1.00E-28       |
| Drosophila erecta             | fly                 | 194857830             | 2.00E-28       |
| Drosophila grimshawi          | fly                 | 195034537             | 2.00E-28       |
| Drosophila melanogaster       | fruit fly           | 17136840              | 2.00E-28       |
| Drosophila virilis            | fly                 | 195386110             | 2.00E-28       |
| Drosophila mojavensis         | fly                 | 195114618             | 4.00E-28       |
| Drosophila persimilis         | fly                 | 195160098             | 6.00E-28       |
| Drosophila pseudoobscura      | fly                 | 198475712             | 7.00E-28       |
| Drosophila ananassae          | fly                 | 194759838             | 7.00E-28       |
| Camponotus floridanus         | ant                 | 307177756             | 1.00E-27       |
| Nematostella vectensis        | sea anemone         | 156079906             | 2.00E-27       |
| Harpegnathos saltator         | ant                 | 307194384             | 3.00E-27       |
| Strongylocentrotus purpuratus | sea urchin          | 72004276              | 3.00E-27       |
| Ciona intestinalis            | sea squirt          | 118343834             | 3.00E-27       |
| Daphnia pulex                 | flea                | 321478250             | 4.00E-27       |
| Tribolium castaneum           | beetle              | 91093127              | 1.00E-26       |
| Solenopsis invicta            | ant                 | 322786068             | 5.00E-26       |
| Anopheles gambiae str. PEST   | mosquito            | 118789617             | 6.00E-26       |
