# Supplementary material for: Dual Delayed Feedback Provides Sensitivity and Robustness to the NF-κB Signaling Module
Source: PubMed Central journal article supplement (PMC3694842; doi:10.1371/journal.pcbi.1003112), 2013-06-27
Supplement: pcbi.1003112.s016.pdf [file pcbi.1003112.s016.pdf]

**Table S7. Organisms with homologs for I $\kappa$ B $\epsilon$** 

| <b>Organism</b>          | <b>Common name</b>  | <b>NCBI gi number</b> | <b>E-value</b> |
|--------------------------|---------------------|-----------------------|----------------|
| Mus musculus             | mouse               | 2739158               | 0              |
| Rattus norvegicus        | rat                 | 40018590              | 0              |
| Bos taurus               | cow                 | 195539539             | 7.00E-161      |
| Ailuropoda melanoleuca   | panda               | 301757312             | 3.00E-159      |
| Callithrix jaccus        | marmoset            | 296198283             | 5.00E-156      |
| Nomascus leucogenys      | gibbon              | 332234141             | 6.00E-155      |
| Pan troglodytes          | chimp               | 114607603             | 1.00E-153      |
| Homo sapiens             | human               | 20530139              | 2.00E-153      |
| Macaca mulatta           | rhesus monkey       | 297290951             | 9.00E-150      |
| Monodelphis domestica    | opossum             | 126310114             | 5.00E-129      |
| Canis familiaris         | dog                 | 73973023              | 2.00E-89       |
| Anolis carolinensis      | anole               | 327262290             | 1.00E-82       |
| Xenopus tropicalis       | western clawed frog | 187608250             | 7.00E-81       |
| Xenopus laevis           | African clawed frog | 147907302             | 5.00E-74       |
| Danio rerio              | zebrafish           | 121583661             | 1.00E-61       |
| Salmo salar              | salmon              | 213514346             | 3.00E-61       |
| Tetraodon nigroviridis   | pufferfish          | 47224342              | 6.00E-53       |
| Gallus gallus            | chicken             | 118088055             | 3.00E-38       |
| Ornithorhynchus anatinus | platypus            | 149542664             | 1.00E-35       |
| Equus caballus           | horse               | 194205729             | 2.00E-29       |

The I $\kappa$ B $\epsilon$  sequences of above organisms are different from the sequences that were found with the I $\kappa$ B $\alpha$  search.
