# Supplementary material for: Dual Delayed Feedback Provides Sensitivity and Robustness to the NF-κB Signaling Module
Source: PubMed Central journal article supplement (PMC3694842; doi:10.1371/journal.pcbi.1003112), 2013-06-27
Supplement: pcbi.1003112.s017.pdf [file pcbi.1003112.s017.pdf]

**Table S8. Genome status of organisms in Tables S6 and S7**

| <b>Organism</b>                      | <b>Common name</b>  | <b>Genome status</b> |
|--------------------------------------|---------------------|----------------------|
| <i>Aedes aegypti</i>                 | mosquito            | Assembly             |
| <i>Ailuropoda melanoleuca</i>        | giant panda         | Assembly             |
| <i>Anolis carolinensis</i>           | anole               | Assembly             |
| <i>Anopheles gambiae</i> str. PEST   | mosquito            | Assembly             |
| <i>Apis mellifera</i>                | honey bee           | Assembly             |
| <i>Biomphalaria glabrata</i>         | snail               | In Progress          |
| <i>Bos taurus</i>                    | cow                 | Assembly             |
| <i>Callithrix jacchus</i>            | marmoset            | Assembly             |
| <i>Camponotus floridanus</i>         | ant                 | Assembly             |
| <i>Canis lupus familiaris</i>        | dog                 | Assembly             |
| <i>Ciona intestinalis</i>            | sea squirt          | Assembly             |
| <i>Danio rerio</i>                   | zebrafish           | Assembly             |
| <i>Daphnia pulex</i>                 | flea                | Assembly             |
| <i>Drosophila ananassae</i>          | fly                 | Assembly             |
| <i>Drosophila erecta</i>             | fly                 | Assembly             |
| <i>Drosophila grimshawi</i>          | fly                 | Assembly             |
| <i>Drosophila melanogaster</i>       | fruit fly           | Assembly             |
| <i>Drosophila mojavensis</i>         | fly                 | Assembly             |
| <i>Drosophila persimilis</i>         | fly                 | Assembly             |
| <i>Drosophila pseudoobscura</i>      | fly                 | Assembly             |
| <i>Drosophila virilis</i>            | fly                 | Complete             |
| <i>Drosophila willistoni</i>         | fly                 | Assembly             |
| <i>Drosophila yakuba</i>             | fly                 | Assembly             |
| <i>Equus caballus</i>                | horse               | Assembly             |
| <i>Gadus morhua</i>                  | Atlantic cod        | In Progress          |
| <i>Gallus gallus</i>                 | chicken             | Assembly             |
| <i>Gorilla gorilla</i>               | gorilla             | Assembly             |
| <i>Harpegnathos saltator</i>         | ant                 | Assembly             |
| <i>Homo sapiens</i>                  | human               | Complete             |
| <i>Lemur catta</i>                   | lemur               | In Progress          |
| <i>Lutzomyia longipalpis</i>         | sandfly             | In Progress          |
| <i>Macaca fascicularis</i>           | macaque             | In Progress          |
| <i>Macaca mulata</i>                 | rhesus monkey       | Assembly             |
| <i>Meleagris gallopavo</i>           | turkey              | Assembly             |
| <i>Monodelphis domestica</i>         | opossum             | Assembly             |
| <i>Mus musculus</i>                  | mouse               | Complete             |
| <i>Nasonia vitripennis</i>           | wasp                | Assembly             |
| <i>Nematostella vectensis</i>        | sea anemone         | Assembly             |
| <i>Nomascus leucogenys</i>           | gibbon              | Assembly             |
| <i>Ornithorhynchus anatinus</i>      | platypus            | Assembly             |
| <i>Oryctolagus cuniculus</i>         | rabbit              | Assembly             |
| <i>Ovis aries</i>                    | sheep               | Assembly             |
| <i>Pan paniscus</i>                  | bonobo              | In Progress          |
| <i>Pan troglodytes</i>               | chimp               | Complete             |
| <i>Pediculus humanus corporis</i>    | human body louse    | Assembly             |
| <i>Pongo abelii</i>                  | orangutan           | Assembly             |
| <i>Rattus norvegicus</i>             | rat                 | Assembly             |
| <i>Salmo salar</i>                   | salmon              | Not Found            |
| <i>Solenopsis invicta</i>            | ant                 | Assembly             |
| <i>Strongylocentrotus purpuratus</i> | sea urchin          | Assembly             |
| <i>Sus scrofa</i>                    | pig                 | Assembly             |
| <i>Taeniopygia guttata</i>           | songbird            | Assembly             |
| <i>Tetraodon nigroviridis</i>        | pufferfish          | Assembly             |
| <i>Tribolium castaneum</i>           | beetle              | Assembly             |
| <i>Xenopus laevis</i>                | African clawed frog | Not Found            |
| <i>Xenopus tropicalis</i>            | western clawed frog | Assembly             |
